# Supplementary material for: Oncogene-induced matrix reorganization controls CD8+ T cell function in the soft-tissue sarcoma microenvironment
Source: PubMed Central journal article supplement (PMC11142734; doi:10.1172/jci167826), 2024-04-23
Supplement: jci-134-167826-s045.pdf [file jci-134-167826-s045.pdf]

kras

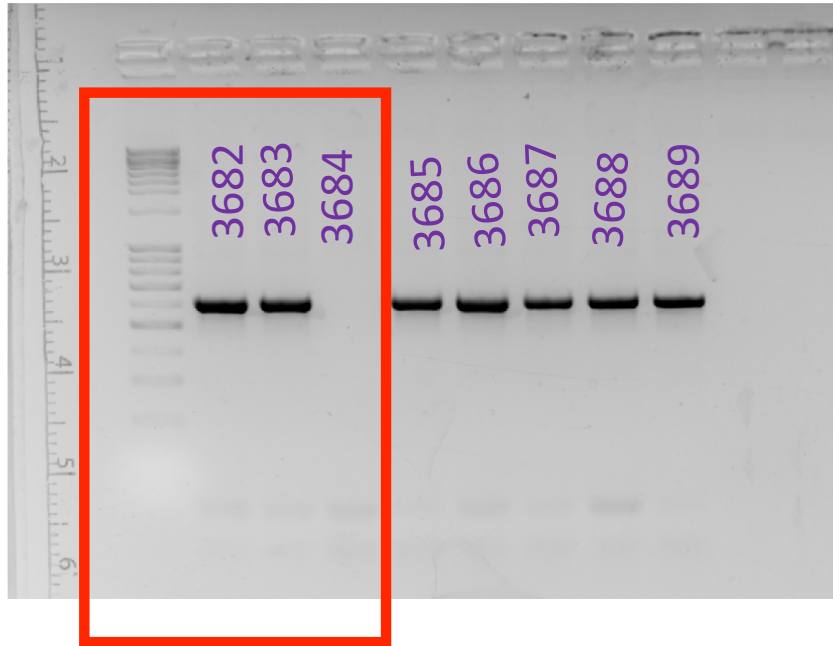

\*\*KrasG12D bands were used in Fig. 1B

All are KrasG12G/+ except 3684 which are wt +/+

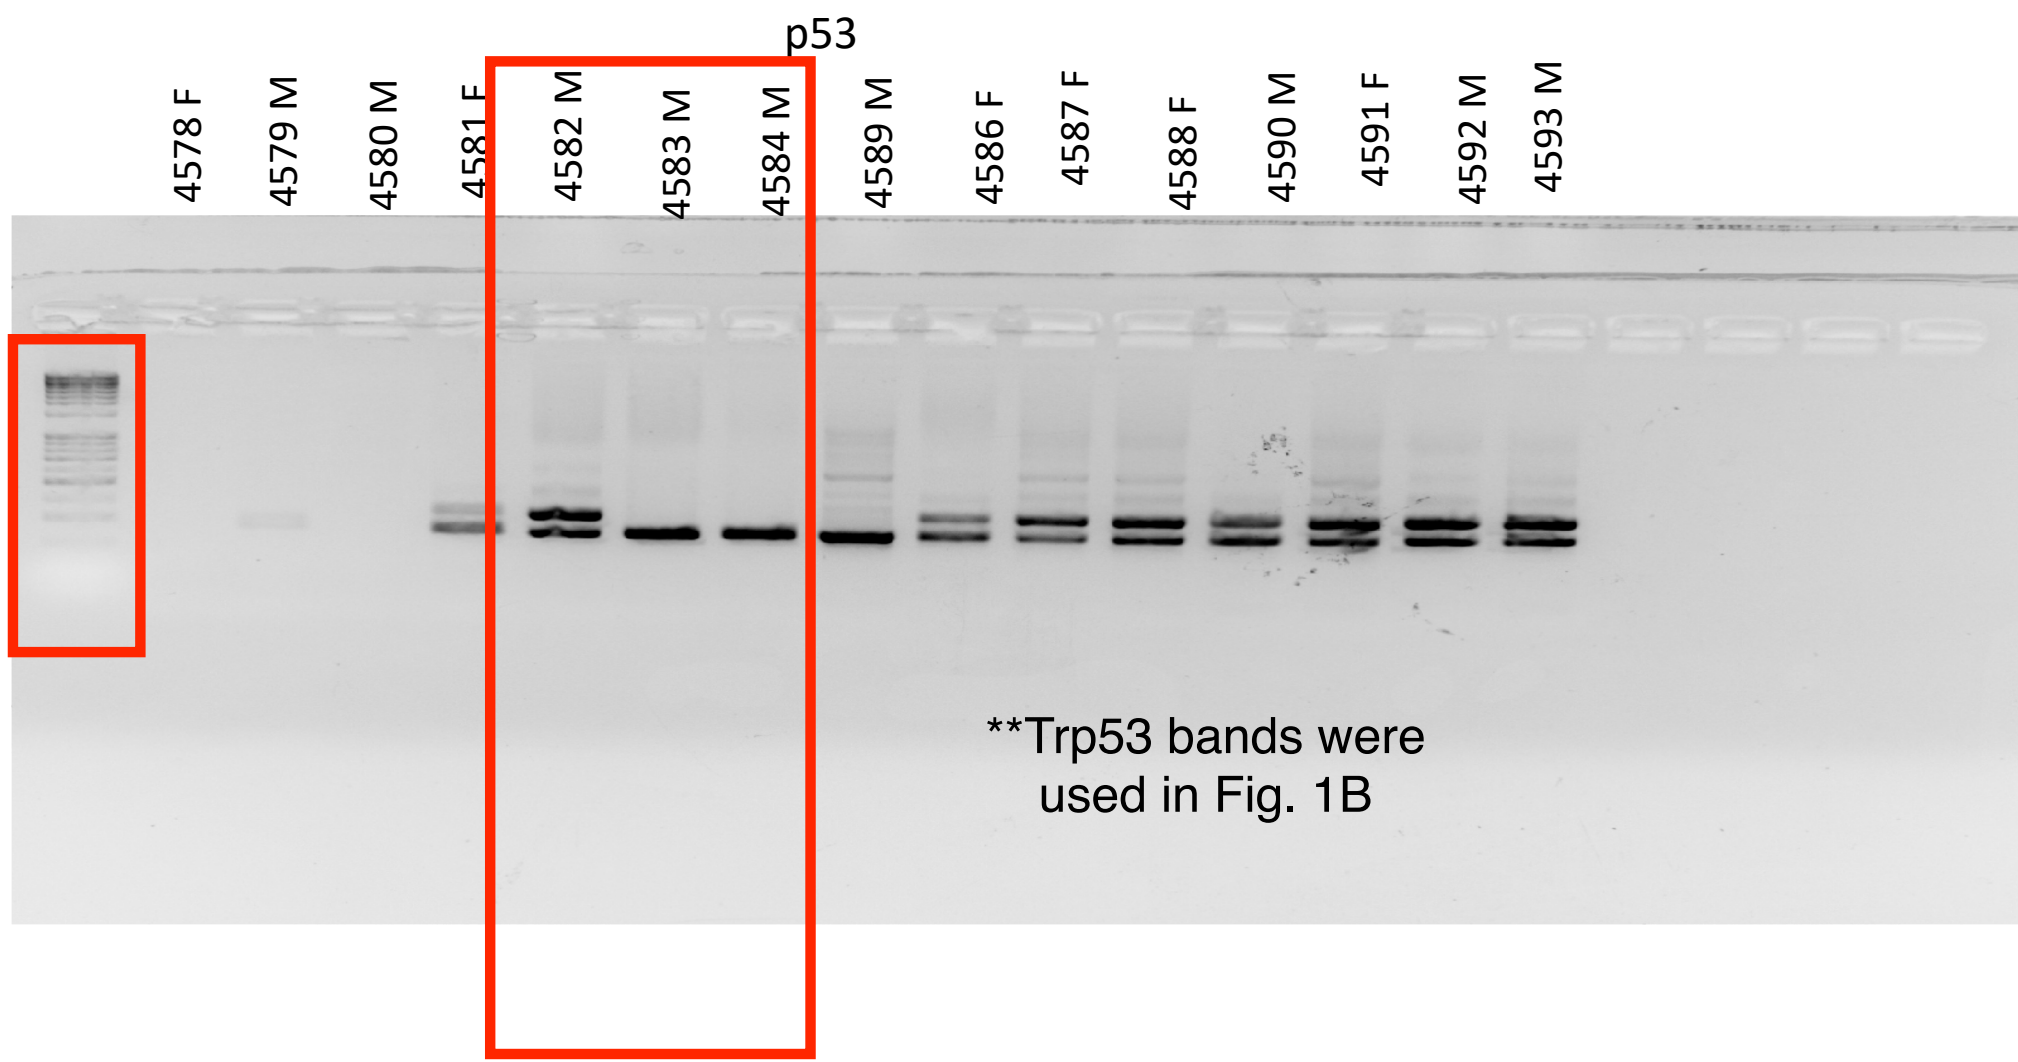

P53

Mutant = 390.

**P53 fl/fl**

Heterozygote = 270 bp and 390

Wild type = 270 bp

4594 M

4595 M

4596 F

Litter 4  
KP x 2 KPY

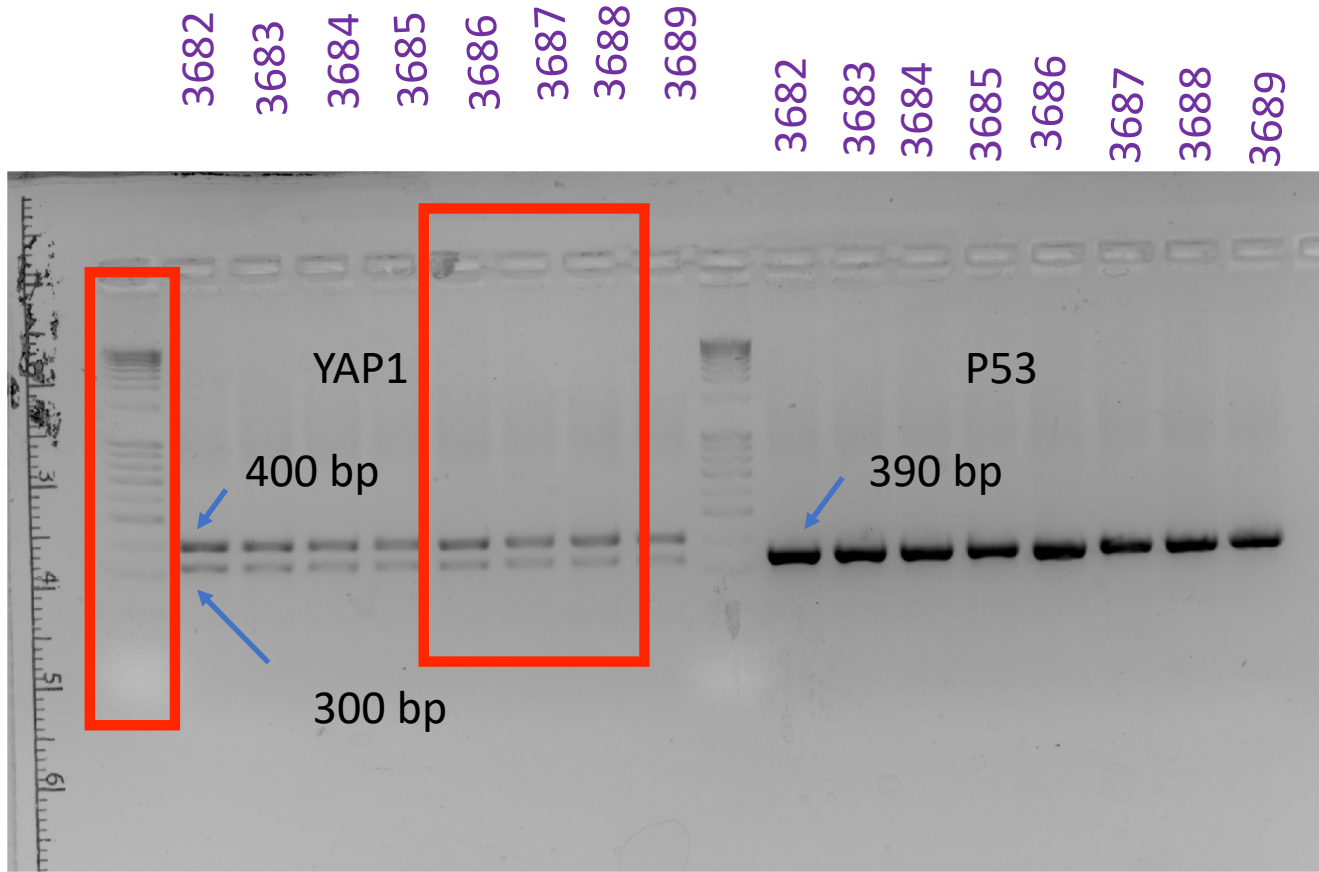

\*\*Yap1 bands were used in Fig. 1B

All are Yap1 fl/+ and p53 fl/fl

YAP1 mutant 400 bp  
Het 300 +400  
WT 300 bp

8-20-19 KP230-shYAP .new PAGE <sup>K</sup> diluent  
 (4-15% Tax) 10 µl  
 baby

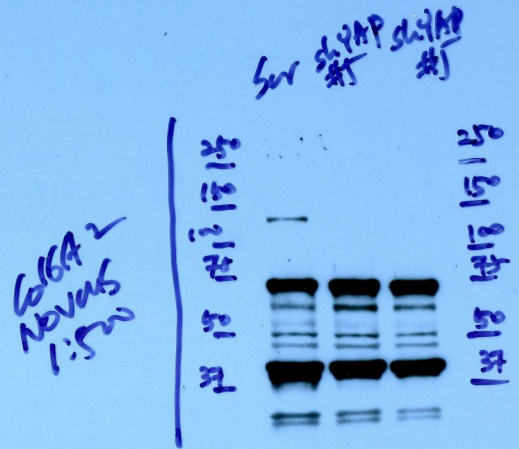

8-20-19  
 KP230-shYAP  
 1/2 diluent .new PAGE  
 (4-15% Tax)  
 10 µl loading

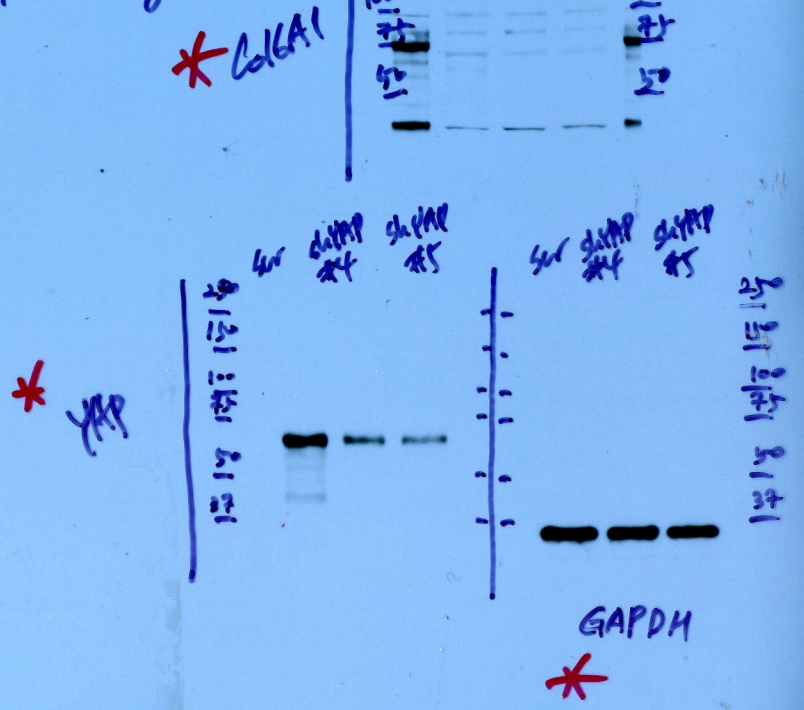

Use the blots w/ red asterisks for Fig. 2E, all three lanes:

Col6a1 = ~150 kDa (note appearance of ladder lines on far left overlapping the handwritten text)

Yap1

Gapdh

8-21-19

KP230-shYAP.

8-20-19 membrane reblotting  
(4-15% TGX)

1hr exposure

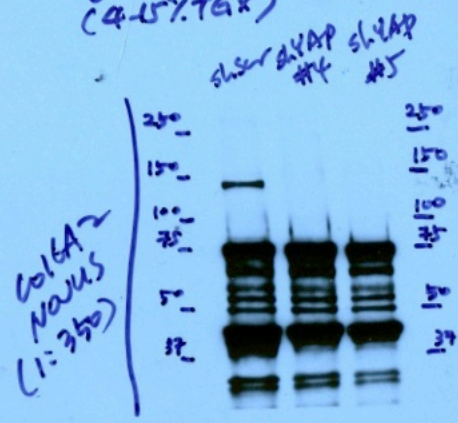

Use for Fig. 2E, Col6a2, all 3 lanes  
Col6a2 = ~150 kDa

8-9-19. Anti-Col6A1 WB.

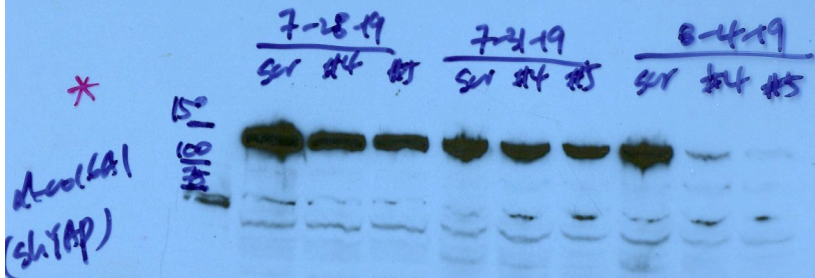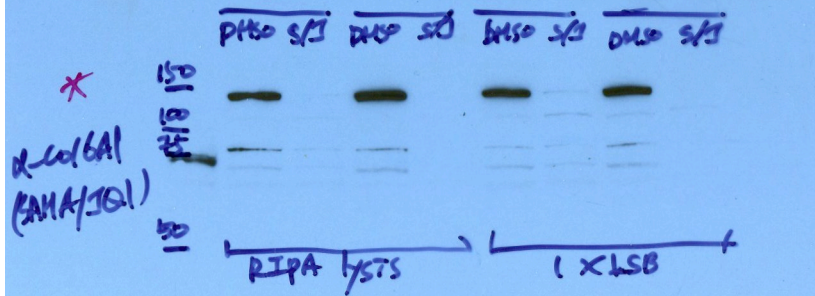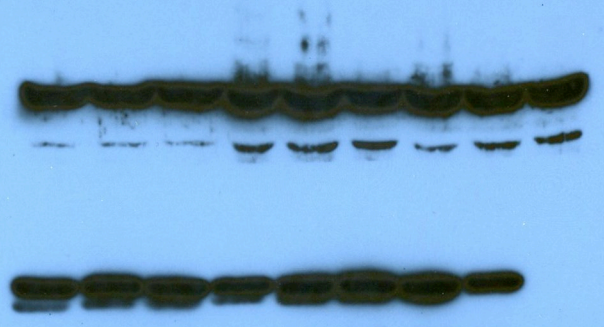

8-9-19. Anti-Col6A1. WB. protein conc. 1:500. Used Ab. (P6)  
 8% PAGE. 10 well. Semi-transfer.  
 loading volume: see note 8-8-19.

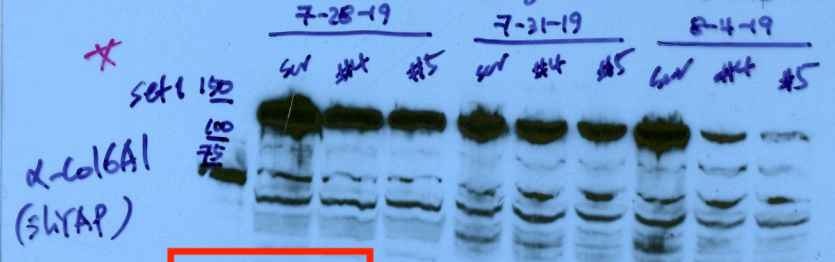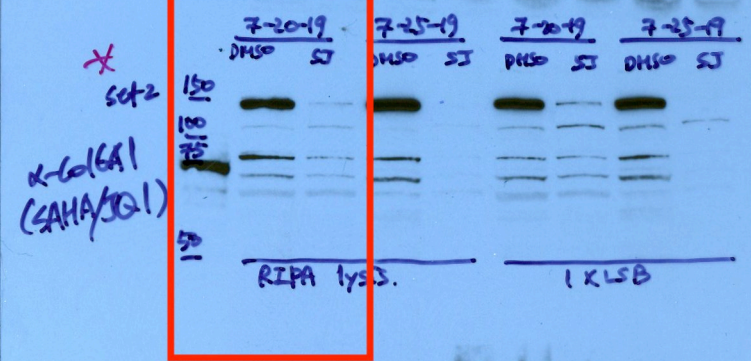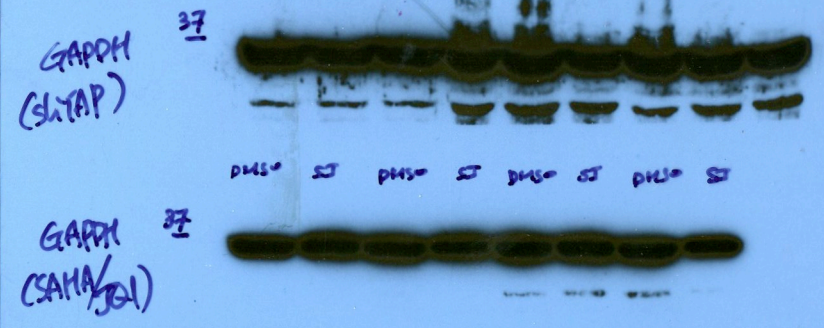

Use indicated lanes for Fig. 2G, Col6a1 (~150 kDa)

8-19-20. Kp-SIS treated sample Reblotting of Col6A2  
 -4-15% TGA. Abnovus

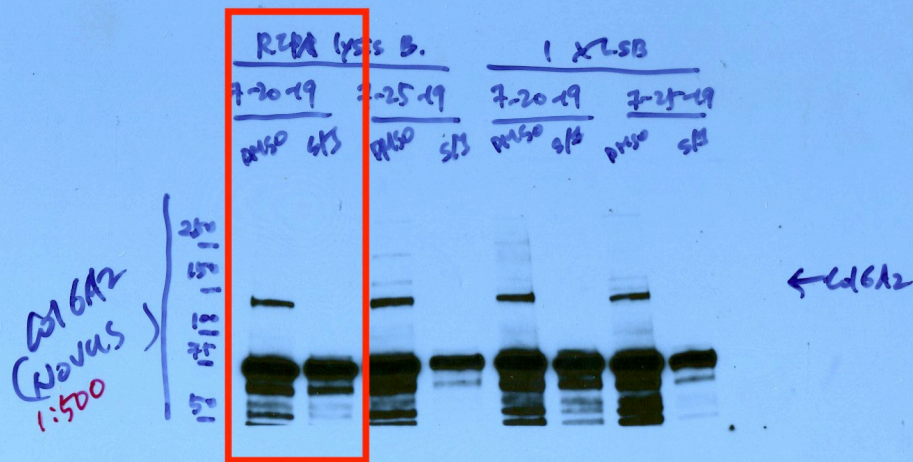

Use indicated lanes for Fig. 2G, Col6a2  
 ~150 kDa

8-19-19.. Kp-SIS treated sample: Reblotting (1:500)  
 -4-15% TGA. d-Col6A2, Novus

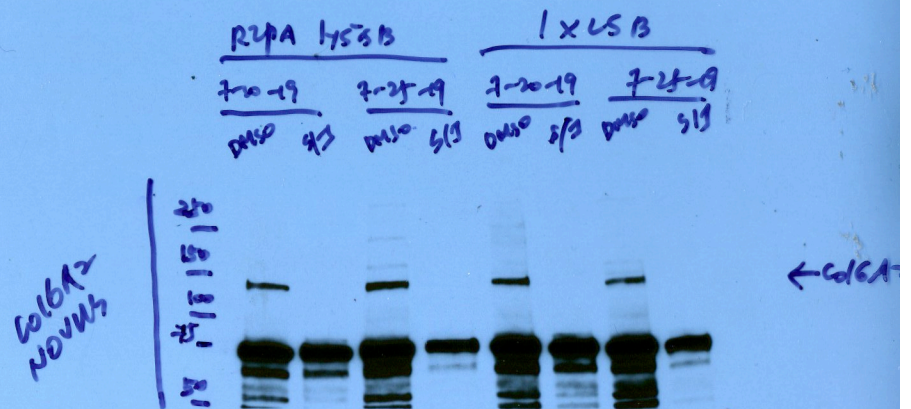

8-9-19.

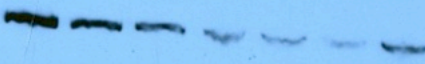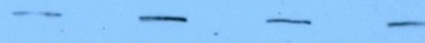

Use indicated lanes for Fig. 2G, Gapdh

GAPDH 37  
(S1/P19)

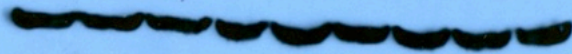

\* GAPDH 37  
(S1/P19)

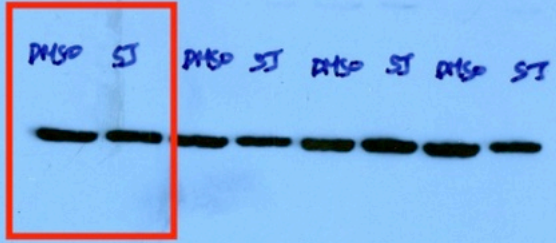



3-2

8-14-19. Kp230-s/s treated. WB w/ YAP

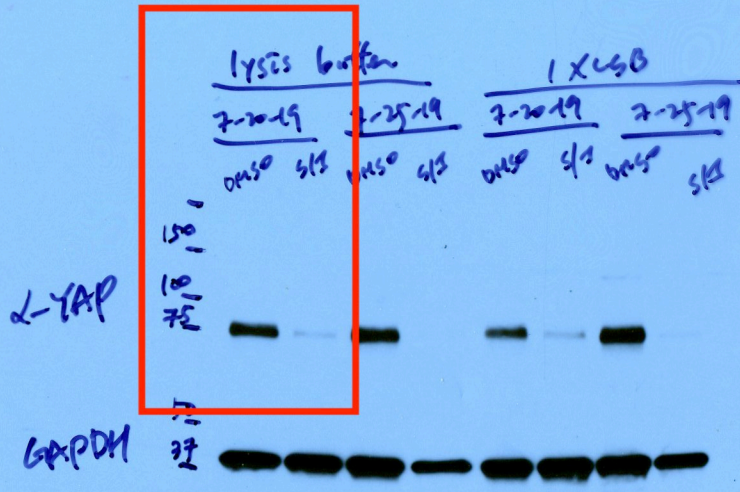

Use indicated lanes for Fig. 2G, Yap1

3-1

8-14-19. Kp230-s/s treated. WB w/ YAP (Ab).  
4-15% Tbx. 10 well.

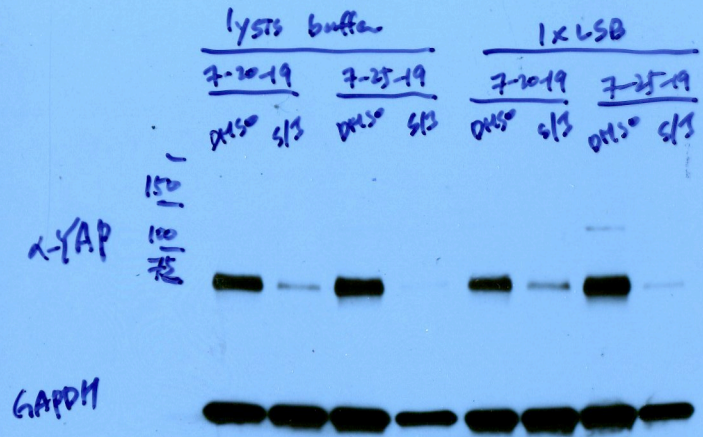

## Fig. 6D, Gapdh

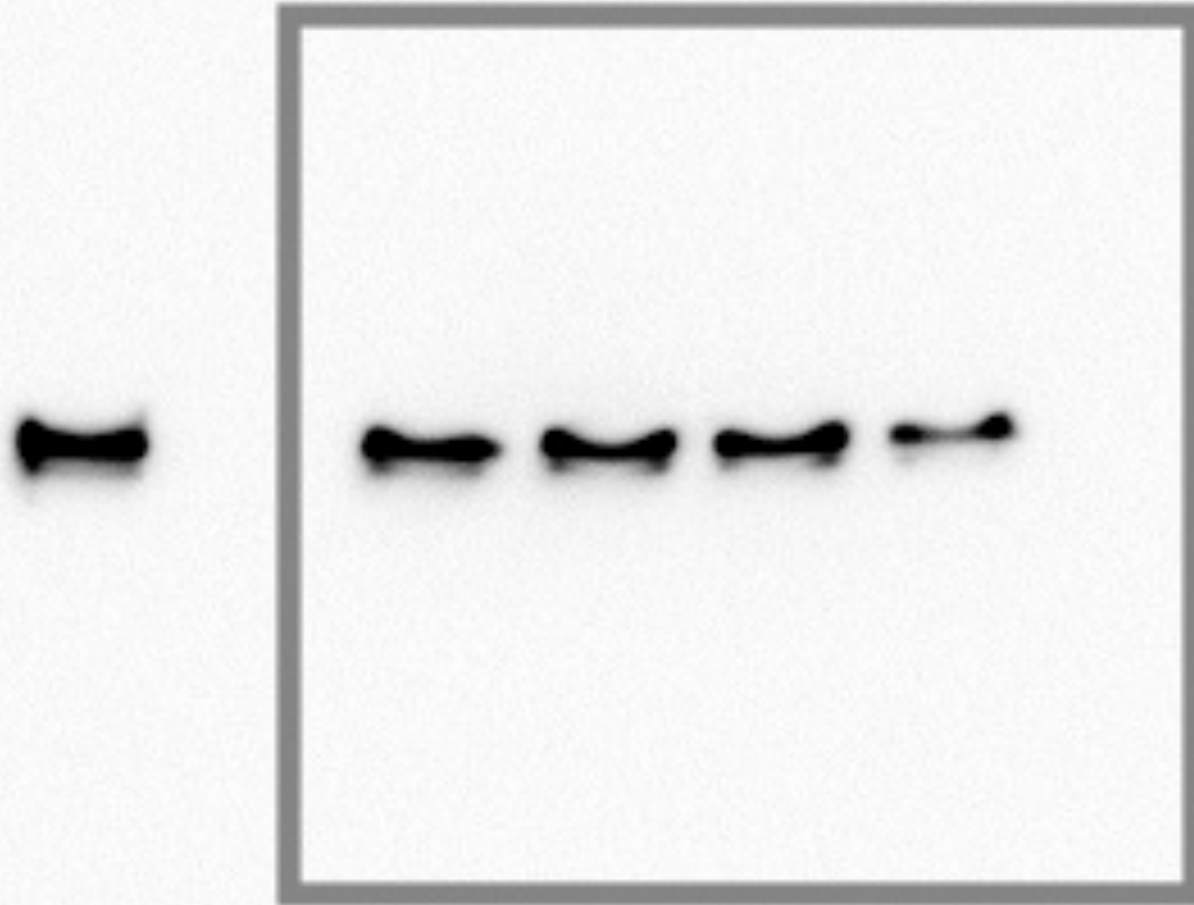

This blot is from the same membrane as the LC3B blot below. The membrane was cut and the two sections were imaged separately because very different exposure times were needed.

# Fig. 6D Lc3b

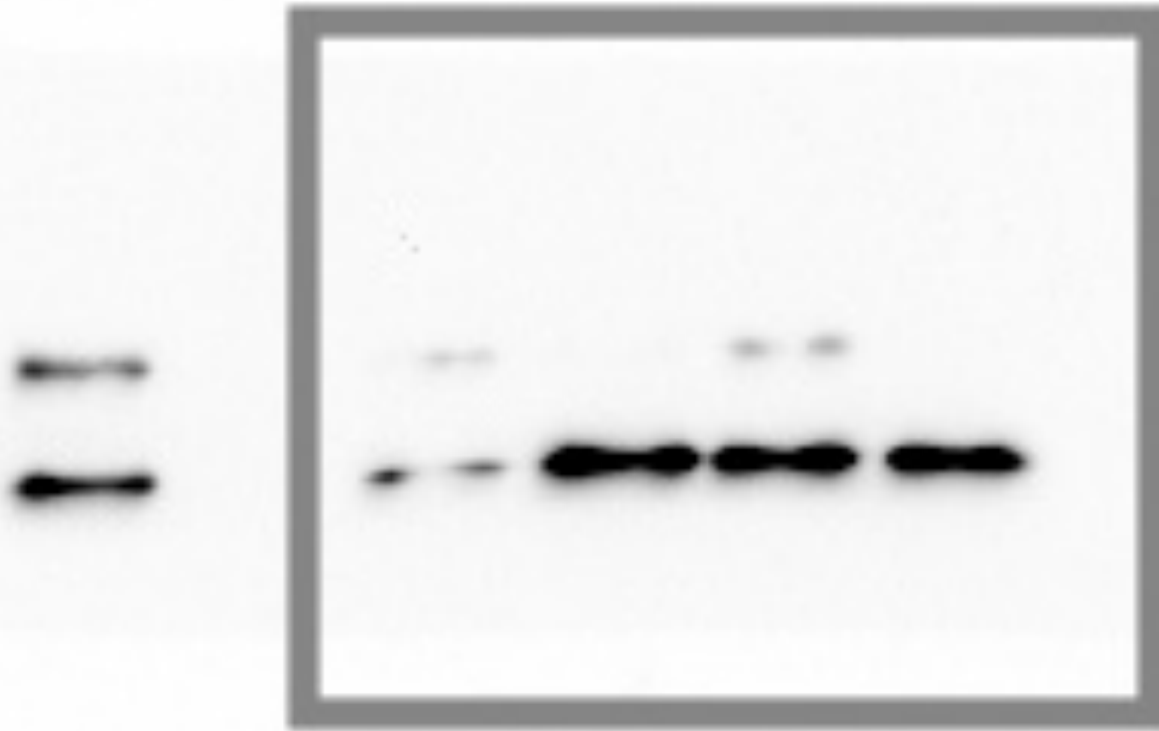

This blot is from the same membrane as the GAPDH blot above. The membrane was cut and the two sections were imaged separately because very different exposure times were needed.

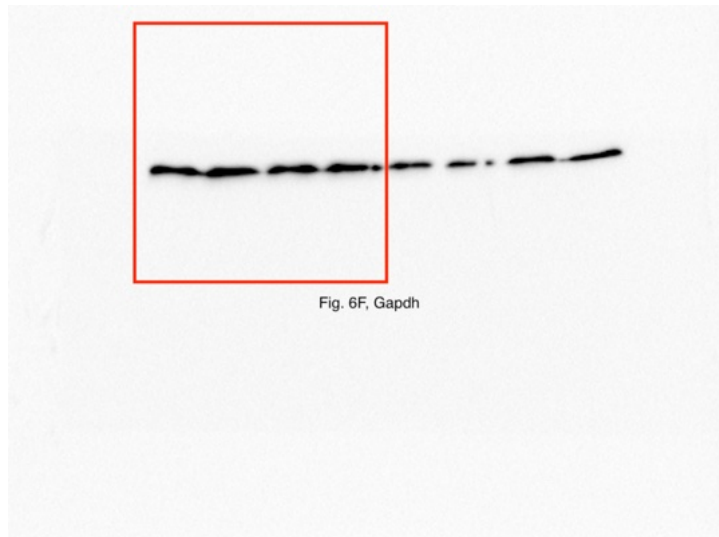

Fig. 6F, Gapdh

Fig. 6F, LC3B  
All 4 lanes

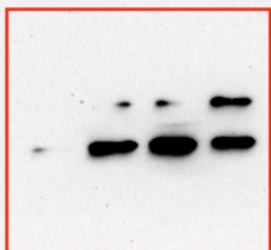

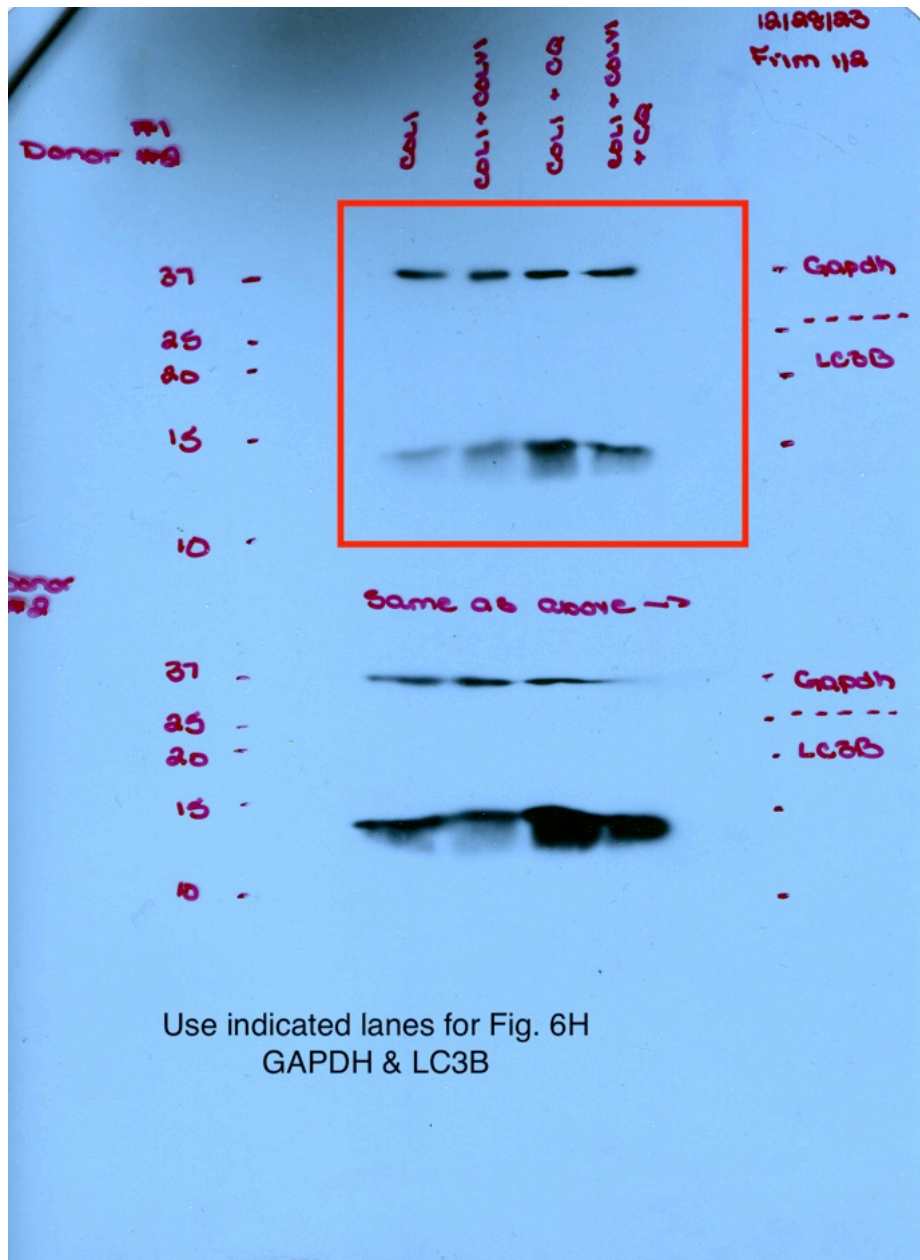

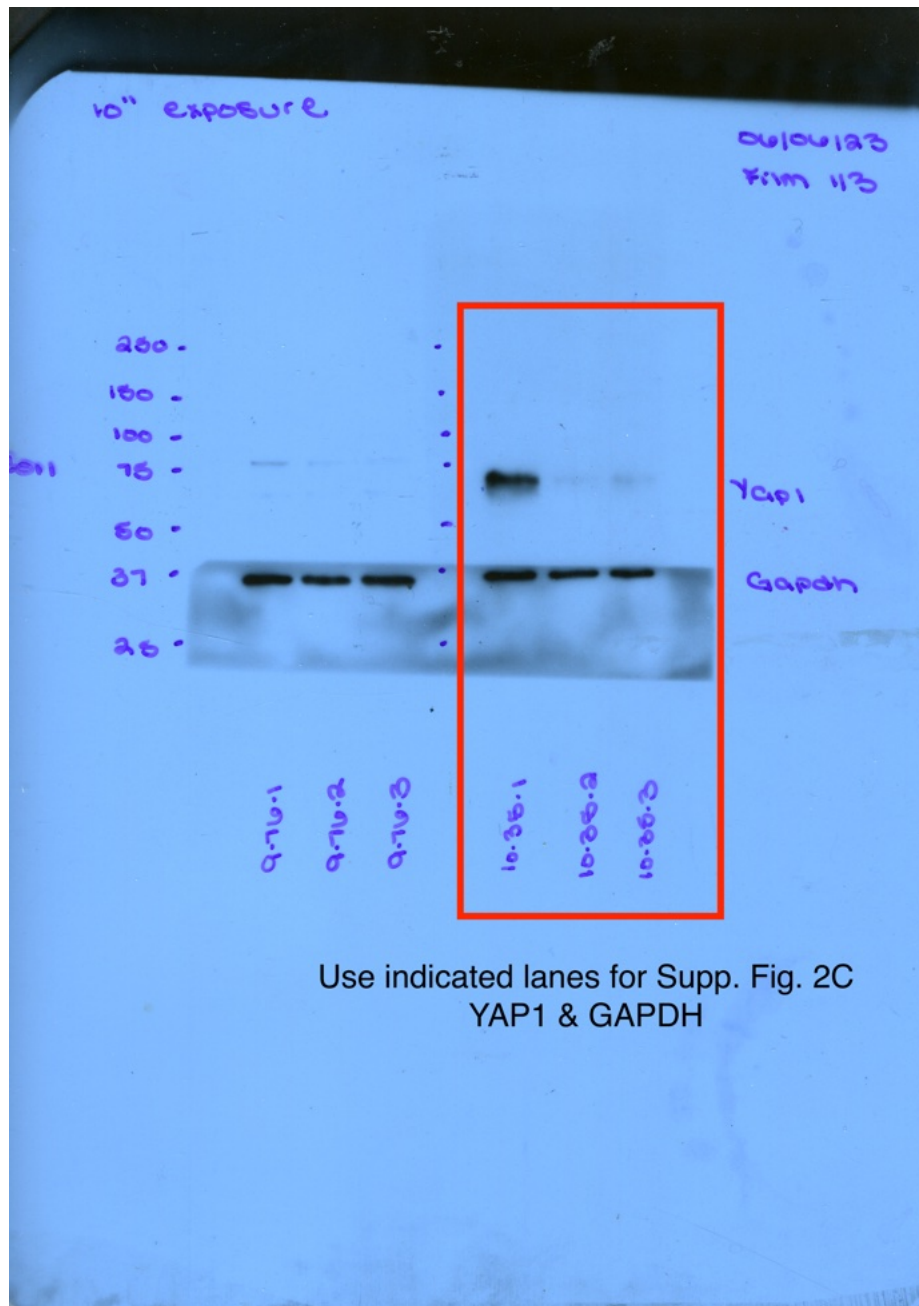

Use indicated lanes for Supp. Fig. 2C  
YAP1 & GAPDH

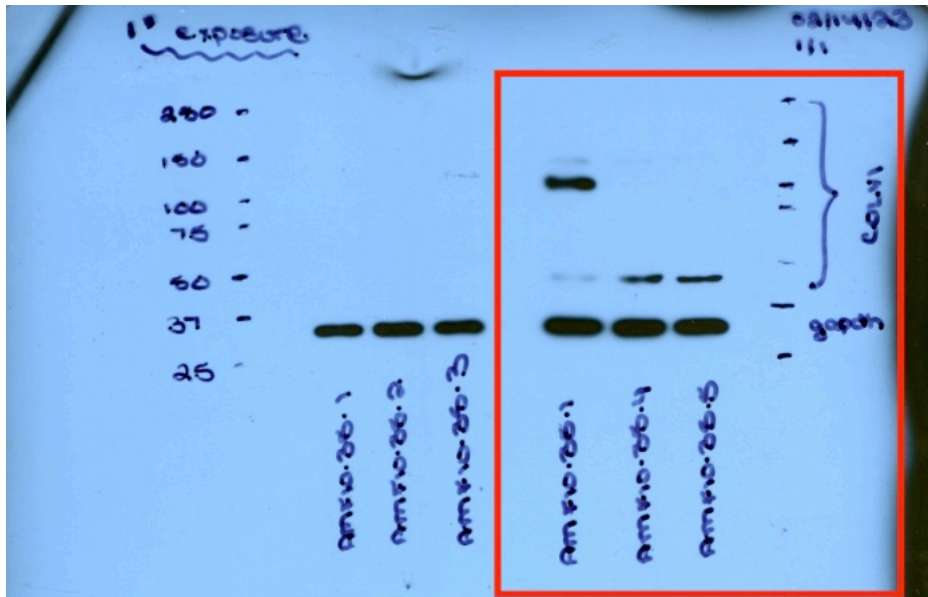

Use indicated lanes for Supp. Fig. 5C  
COLVI (~150 kDa) & GAPDH

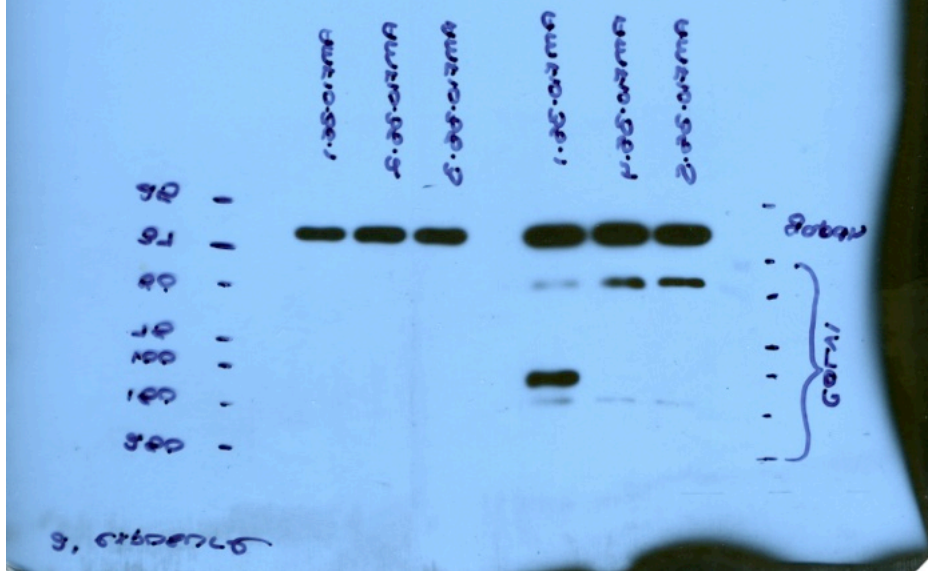



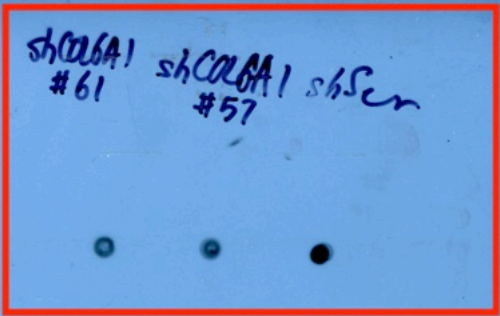

Use indicated lanes for  
Supp. Fig. 5G, ColVI

Duplicate

STR109 CM Dot blot

COLVI protein-tech 17023-1AP

12/29/23

↑

B6KP Dot blot CM  
COLVI

shScr  
shCol1A1 #5  
shCol6a1 #33

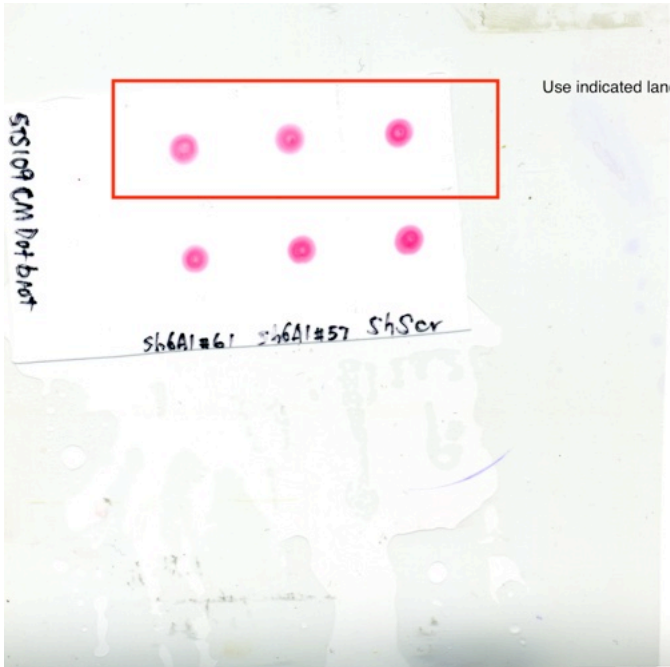

Use indicated lanes for Supp. Fig. 5G, Ponceau

Use indicated spots for Supp. Fig. 5H, ColVI

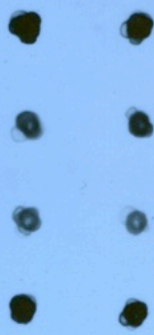

shSur

shCol1a1

shCdba1

shSur

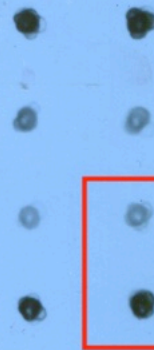

↔  
Duplicat@s

← mirrored →

↔  
Duplicat@s

B6KP CM  
YL 4/25/2023

anti-Col6  
proteinTech

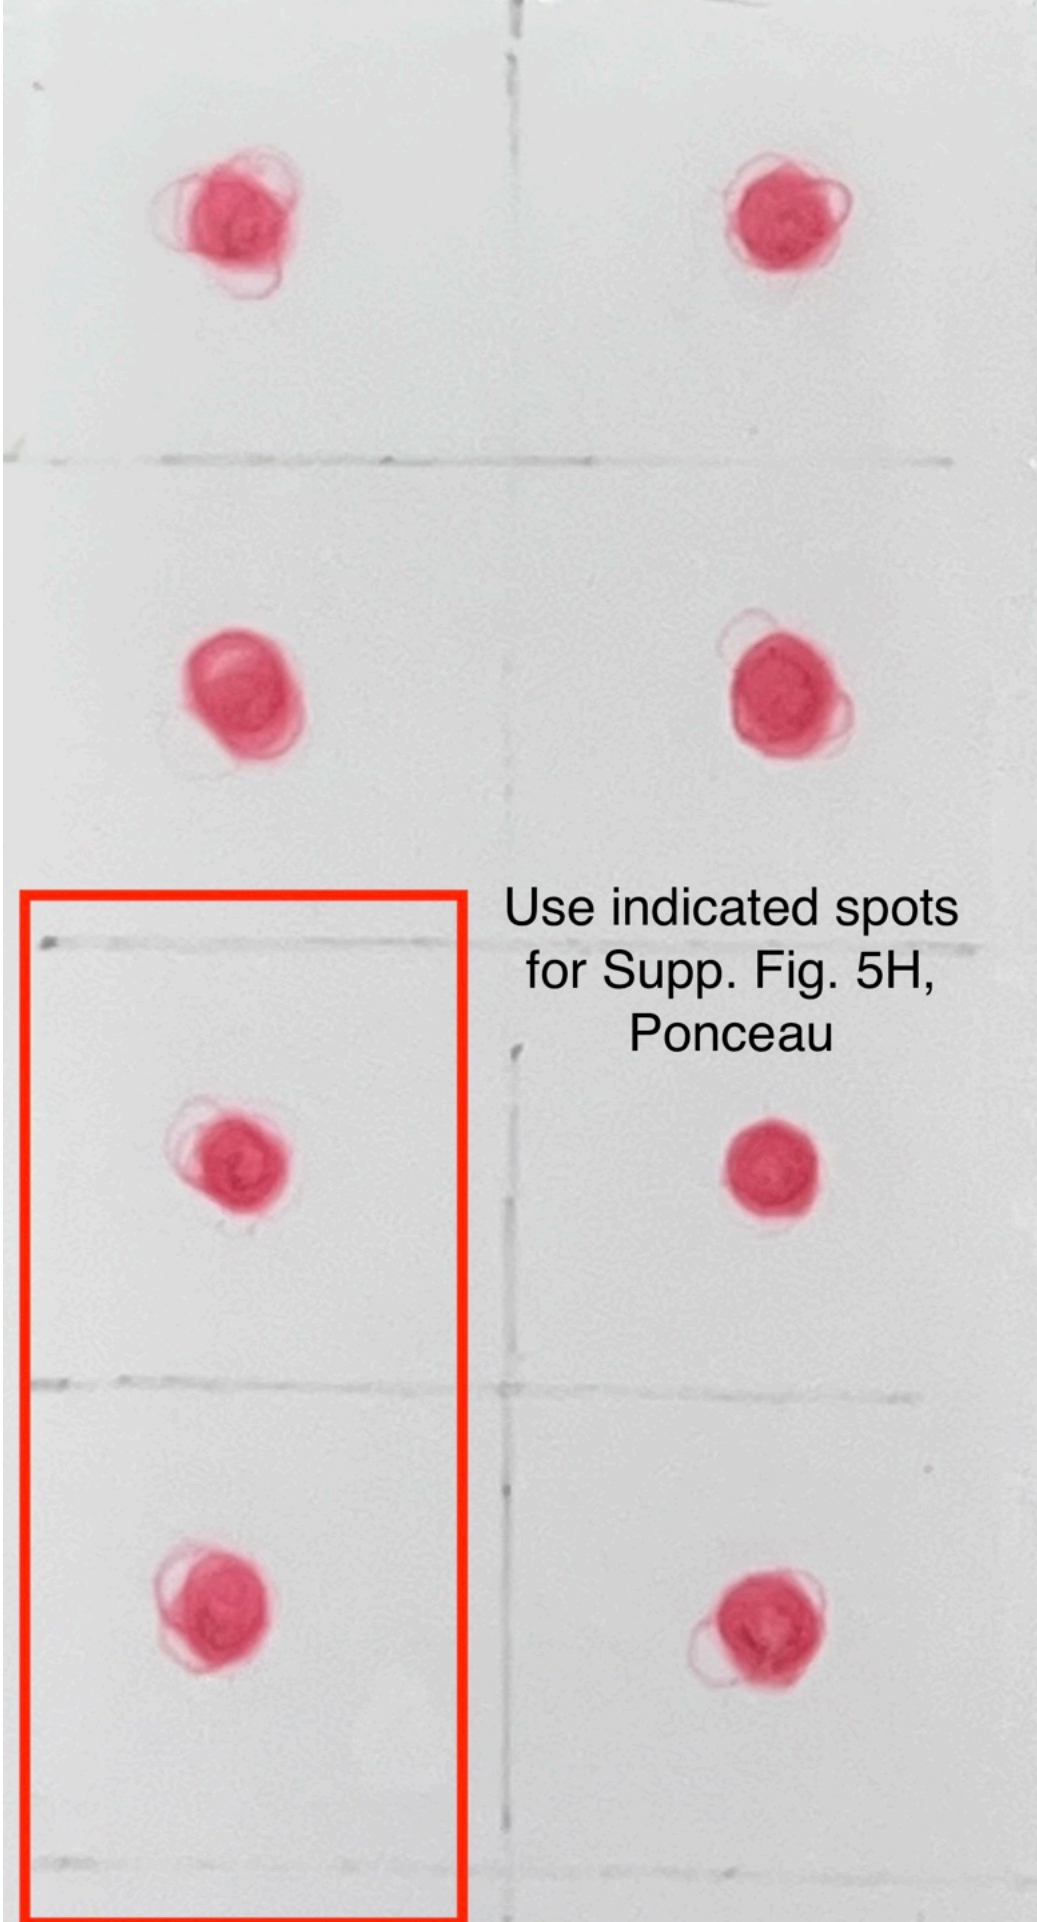

Use indicated spots  
for Supp. Fig. 5H,  
Ponceau

Exp 208 re-run 2

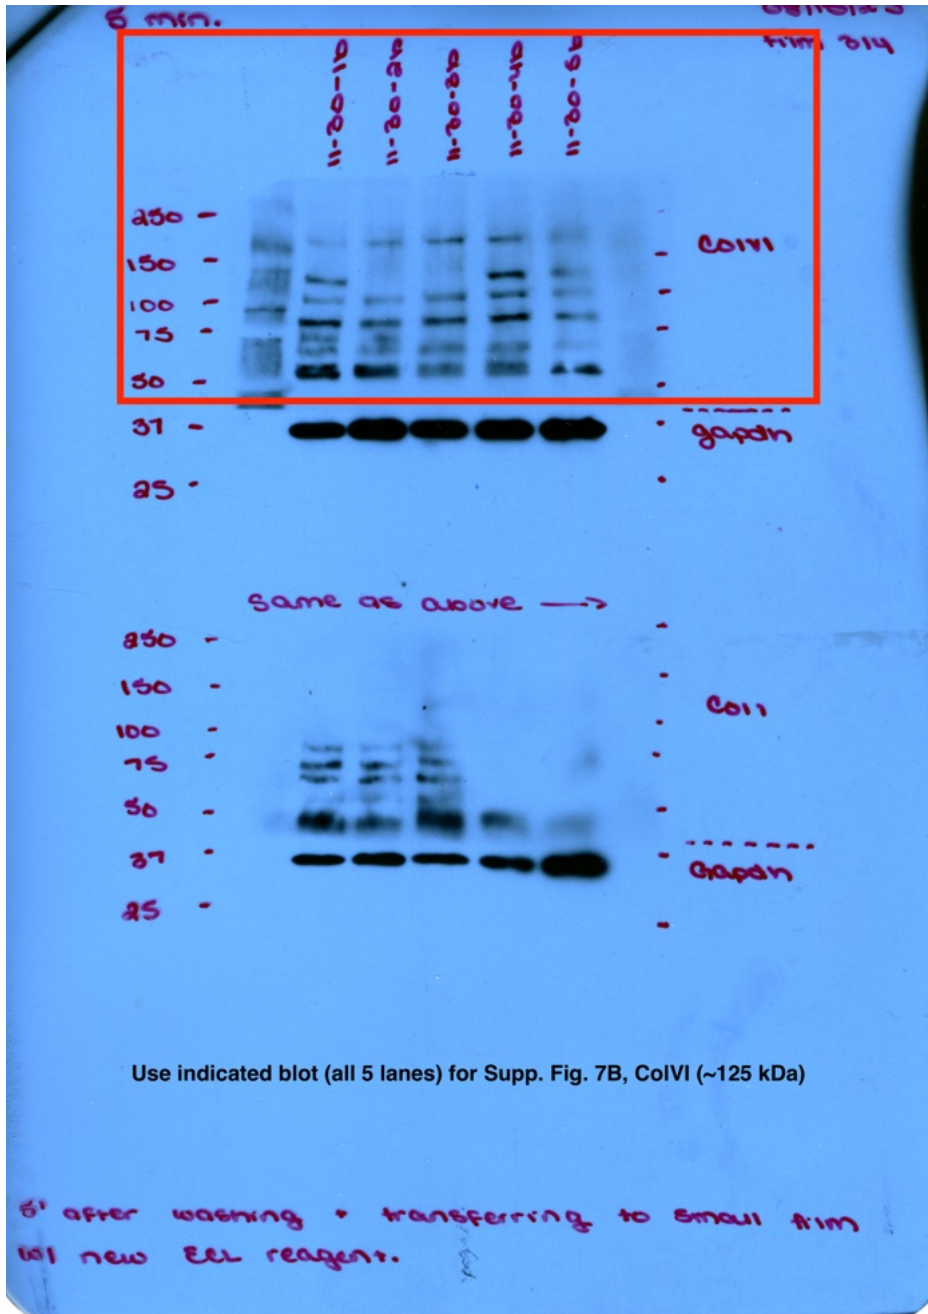

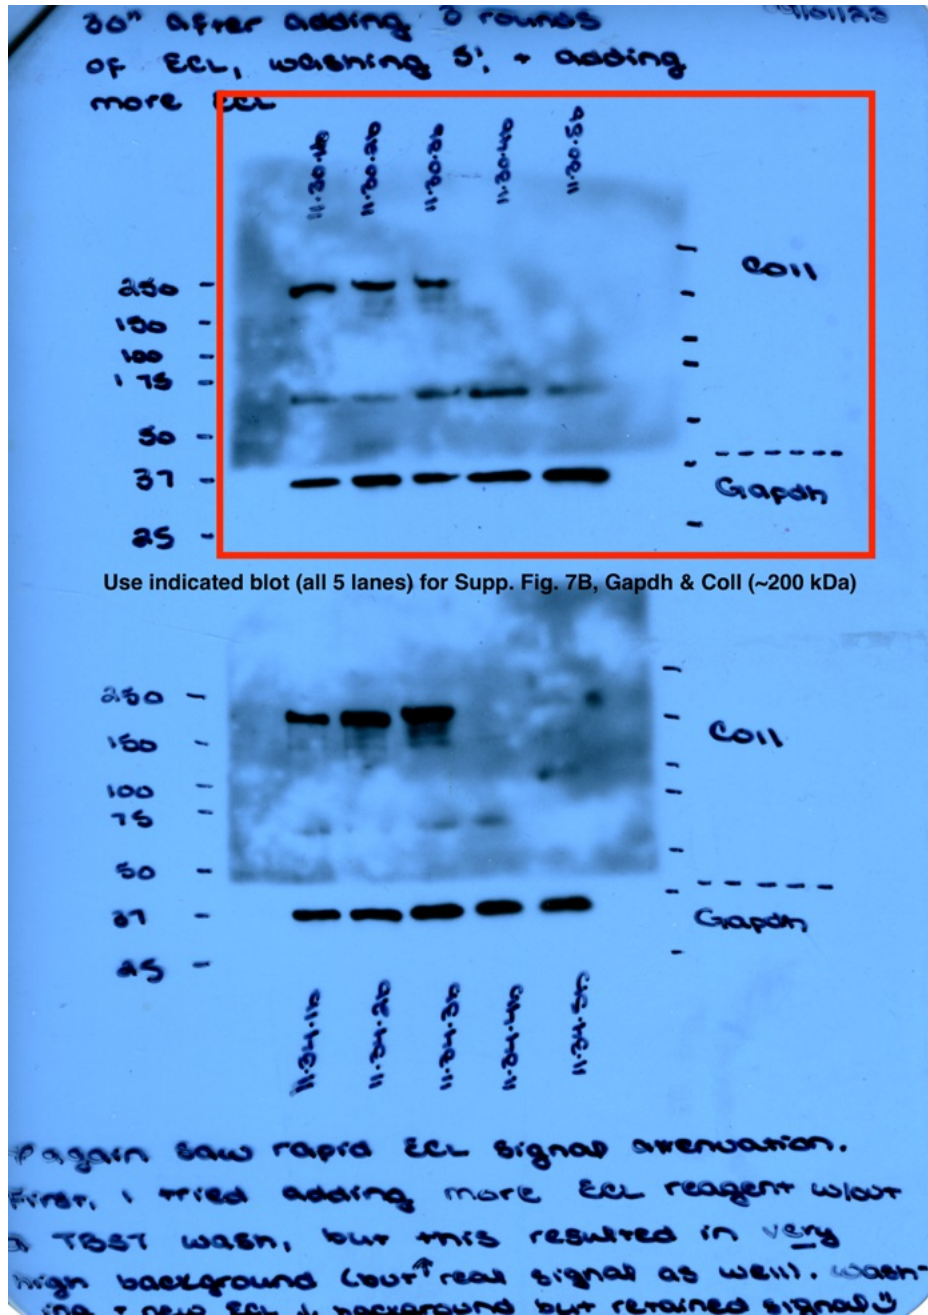

Use all 3 spots for Supp. Fig. 7D, Coll

shsur

shColla1 #15

shColla1 #33

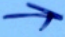

B6KP DM dot blot

coll Boston bio

2/29/23 YL

Use indicated spots for Supp. Fig. 7D, Ponceau

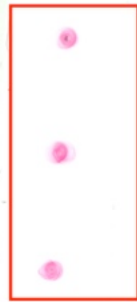

|          |          |
|----------|----------|
| siScr    | siScr    |
| shCol1a1 | shCol1a1 |
| shCol6a1 | shCol6a1 |
| EAHP CM  | B6HP CM  |

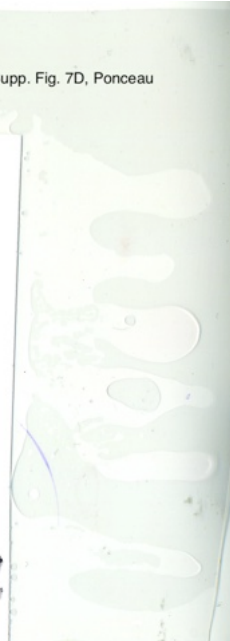



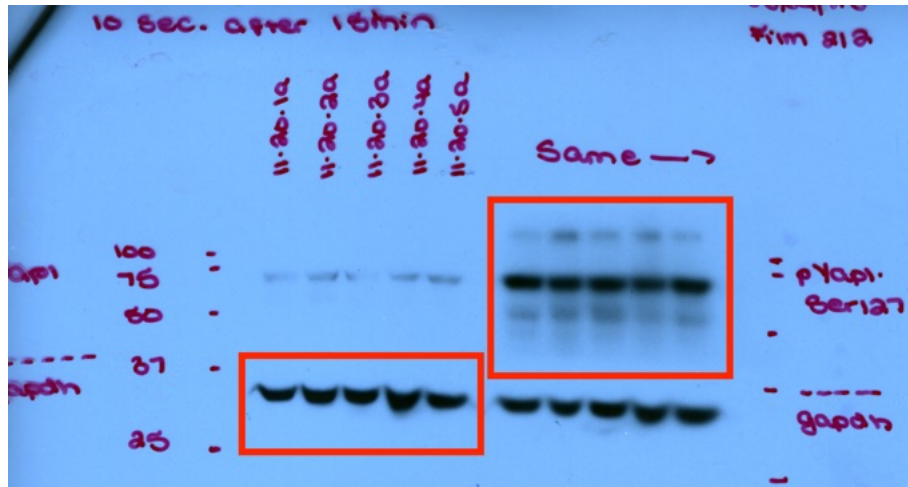

Use indicated sections/lanes for Supp. Fig. 9E  
 Gapdh  
 pYap1-S127 (~75 kDa)

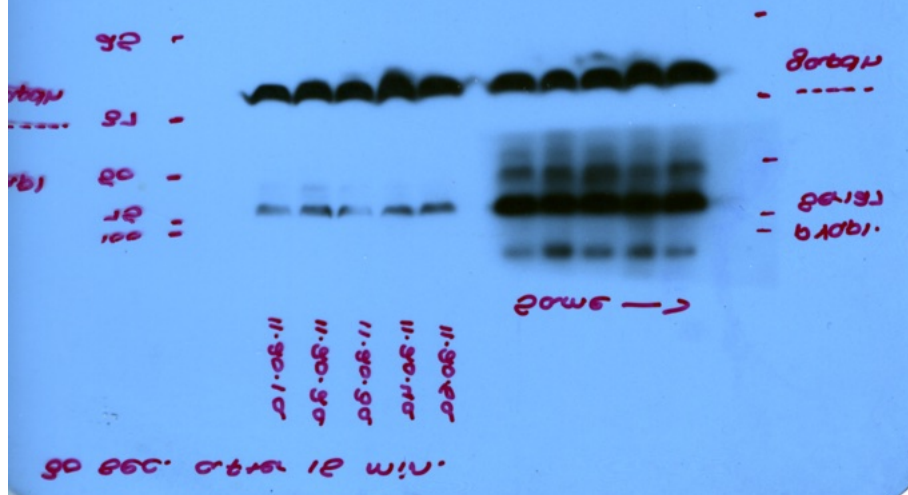

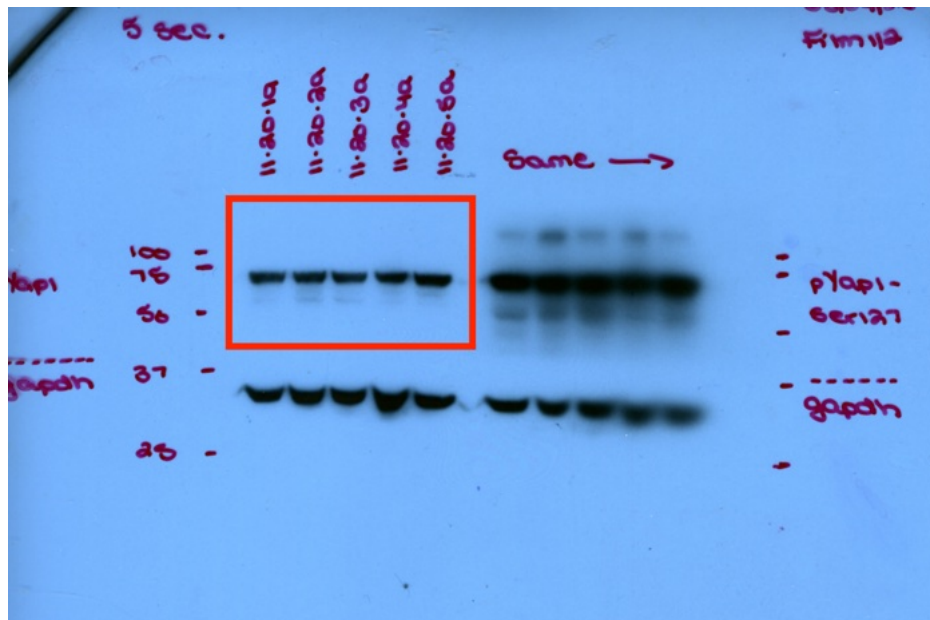

Use indicated lanes/sections for Supp. Fig. 9E, Yap1

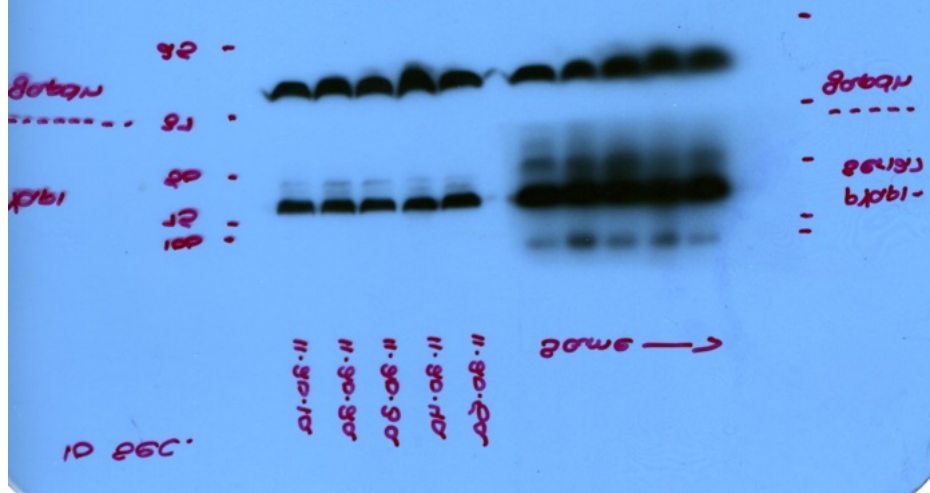

removed membrane to the bottom of  
the plastic sleeve to get rid of visible  
crease (lanes 4-6 in film 1). did a tiny  
bit of H<sub>2</sub>O under membrane to remove stubborn  
air bubbles but I think this interfered  
with or washed away the EEL on the right  
side of the blot. Nevertheless, I captured a  
full "set" of samples so no need to repeat.

07/14/23  
Film 212

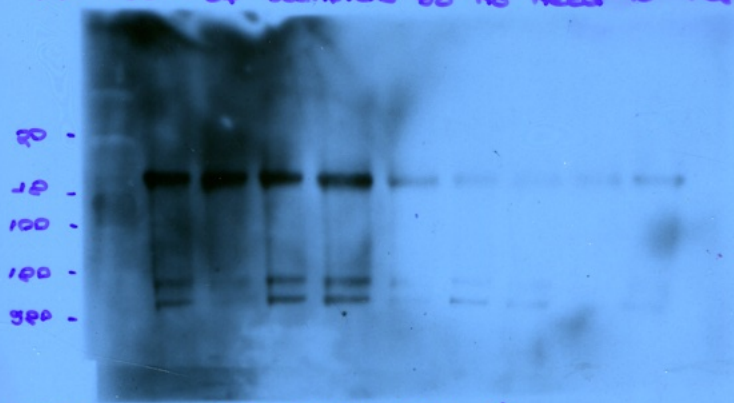

after 30' 30' after 30' 30' ↑

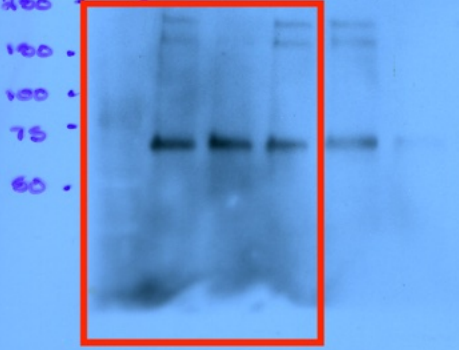

Use indicated lanes for Supp. Fig. 11E, Coll (~150-250 kDa)
